# Supplementary material
Source: MDPI journal article supplement (https://www.mdpi.com/2075-4701/13/10/1665)
Supplement: s1 [file s1]

# Supplementary material

## **Performance Assessment of Wood Ash and Bone Char for Manganese Treatment in Acid Mine Drainage**

Ivana Smičiklas<sup>1,\*</sup>, Bojan Janković<sup>1</sup>, Mihajlo Jović<sup>1</sup>, Jelena Maletaškić<sup>1</sup>, Nebojša Manić<sup>2</sup>,  
Snežana Dragović<sup>1</sup>

<sup>1</sup> *“VINČA” Institute of Nuclear Sciences - National Institute of the Republic of Serbia,  
University of Belgrade, Mike Petrovića Alasa 12-14, P.O. Box 522, 11001 Belgrade, Serbia*

<sup>2</sup> *University of Belgrade, Faculty of Mechanical Engineering, Kraljice Marije 16, P.O. Box 35,  
11120 Belgrade, Serbia*

\* Corresponding author: [ivanat@vin.bg.ac.rs](mailto:ivanat@vin.bg.ac.rs)

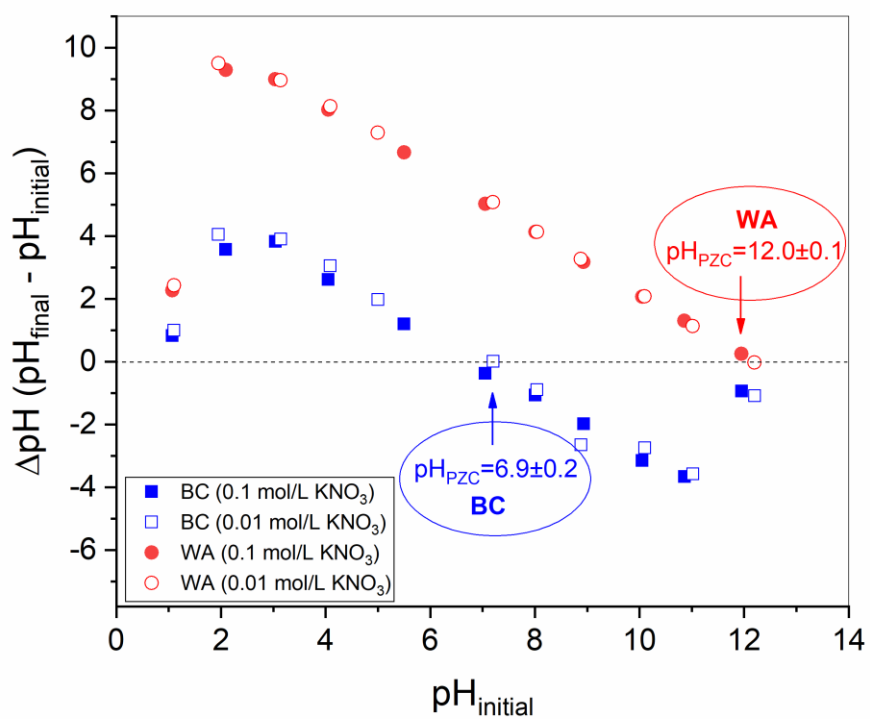

**Figure S1.** Determination of the point of zero charge ( $\text{pH}_{\text{PZC}}$ ) of the BC and WA samples.

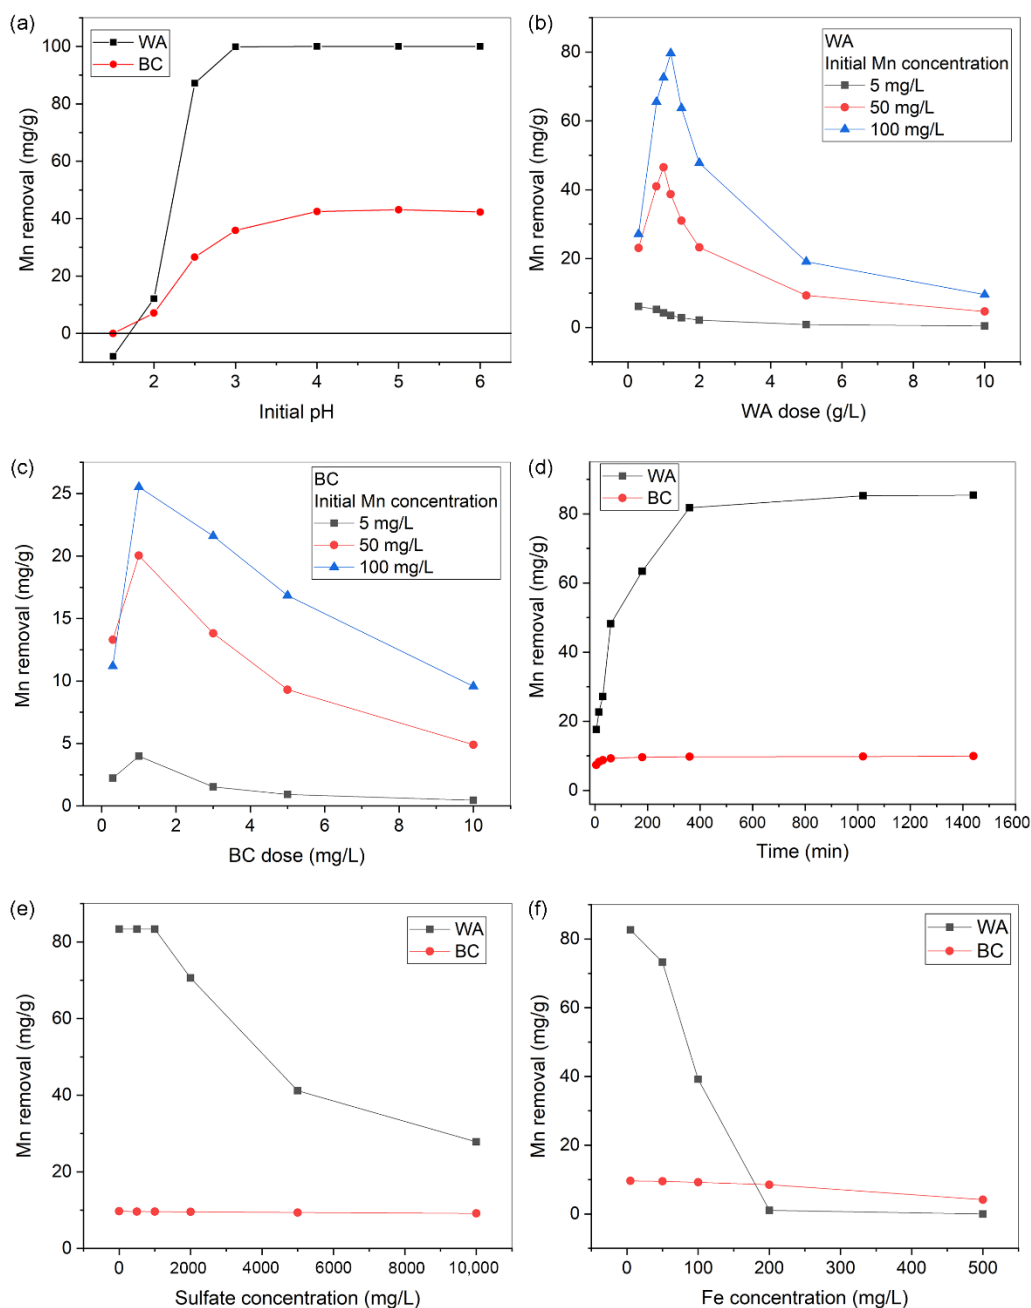

**Figure S2.** The amounts of Mn removed per unit mass of reagent (mg/g) as affected by (a) initial pH (dose 1 g/L, initial Mn concentration 100 mg/L, contact time 24 h), (b) WA dose and Mn concentration (initial pH 2.5, contact time 24 h), (c) BC dose and Mn concentration (initial pH 2.5, contact time 24 h), (d) contact time (initial Mn concentration 100 mg/L, dose 1.2 g/L WA and 10 g/L BC, initial pH 2.5), (e) sulfate concentration (initial Mn concentration 100 mg/L, dose 1.2 g/L WA and 10 g/L BC, initial pH 2.5, contact time 24 h), (f) Fe concentration (initial Mn concentration 100 mg/L, dose 1.2 g/L WA and 10 g/L BC, initial pH 2.5, contact time 24 h).

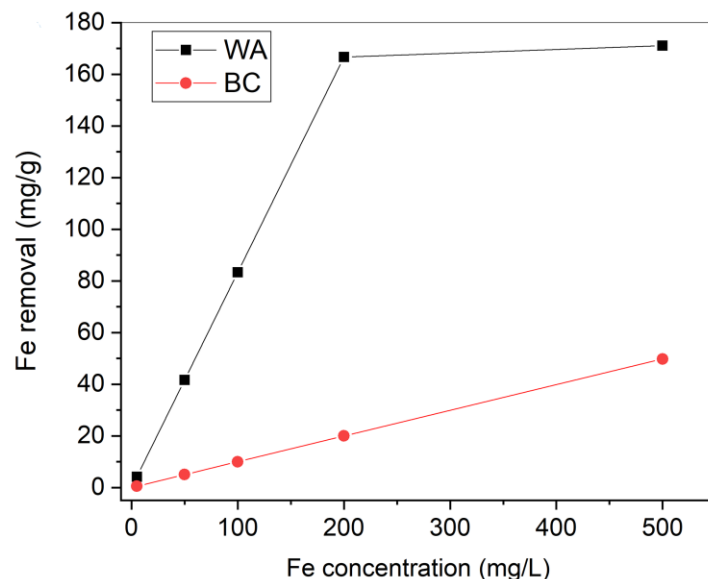

**Figure S3.** The amounts of Fe removed per unit mass of reagent (mg/g) as affected by the concentration of Fe. Initial Mn concentration 100 mg/L, dose 1.2 g/L WA and 10 g/L BC, initial pH 2.5, contact time 24 h.

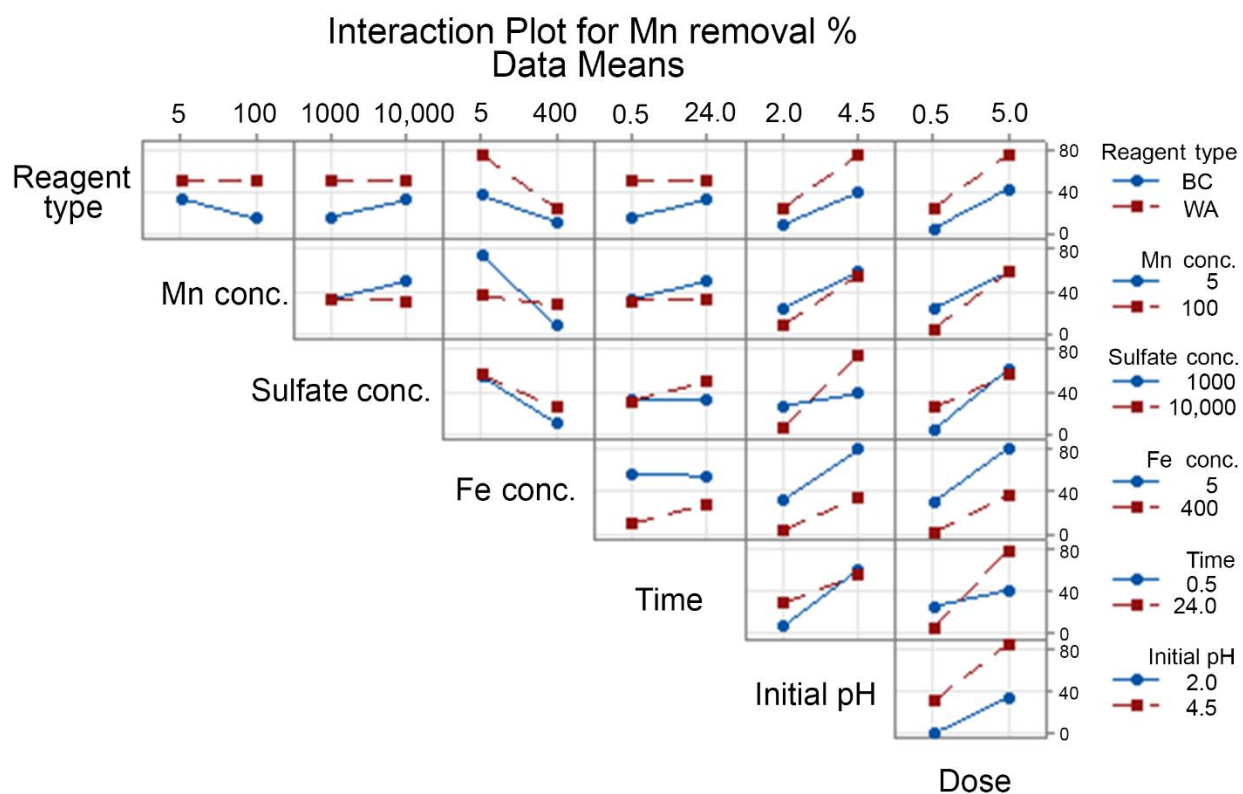

**Figure S4.** Interaction plot for Mn removal.

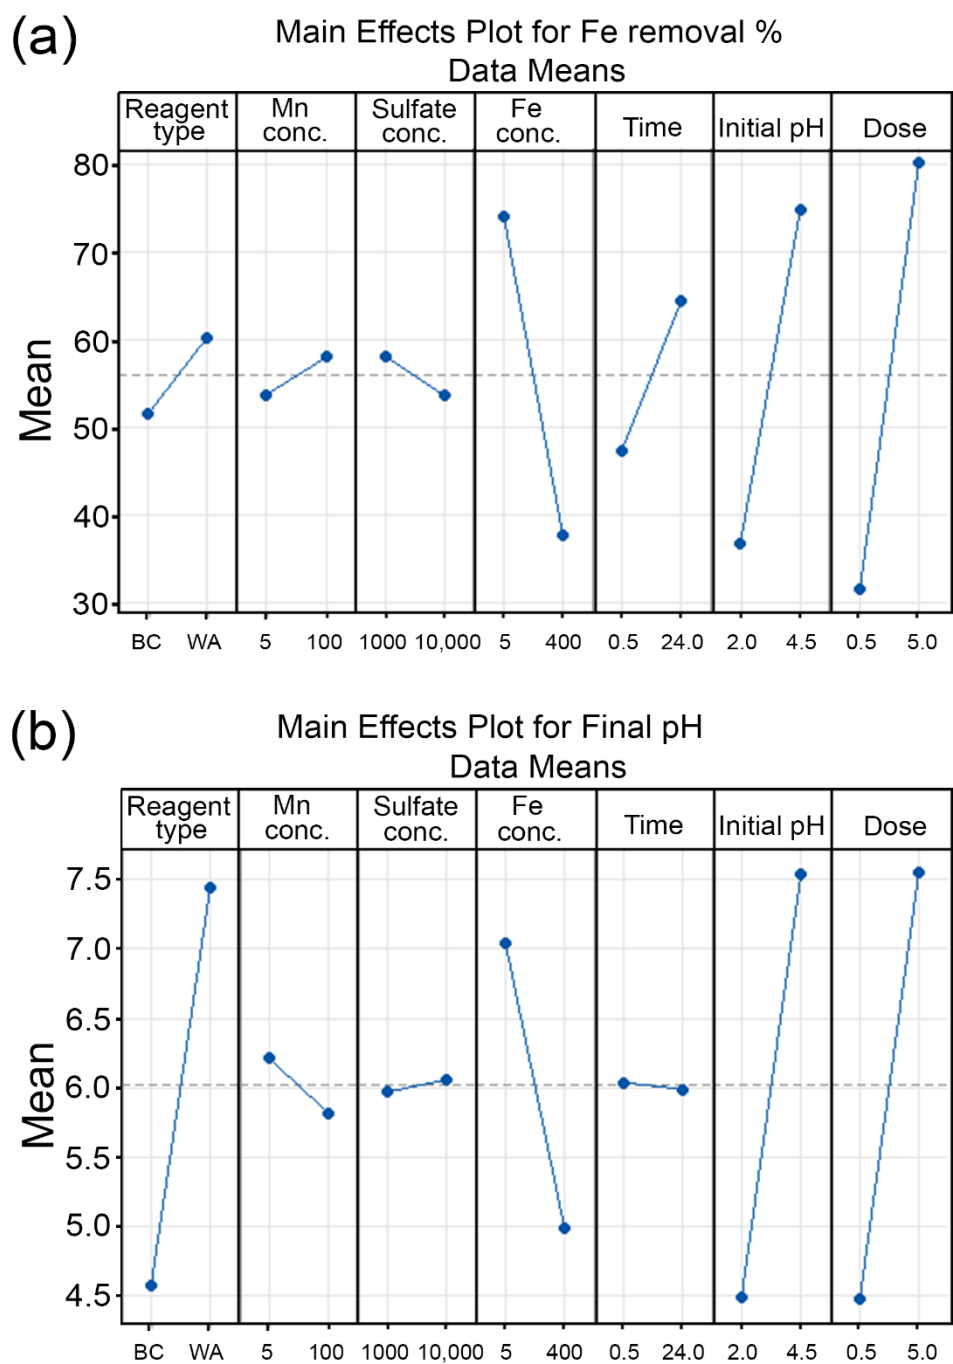

**Figure S5.** Main effect plots for (a) Fe removal, and (b) final pH.

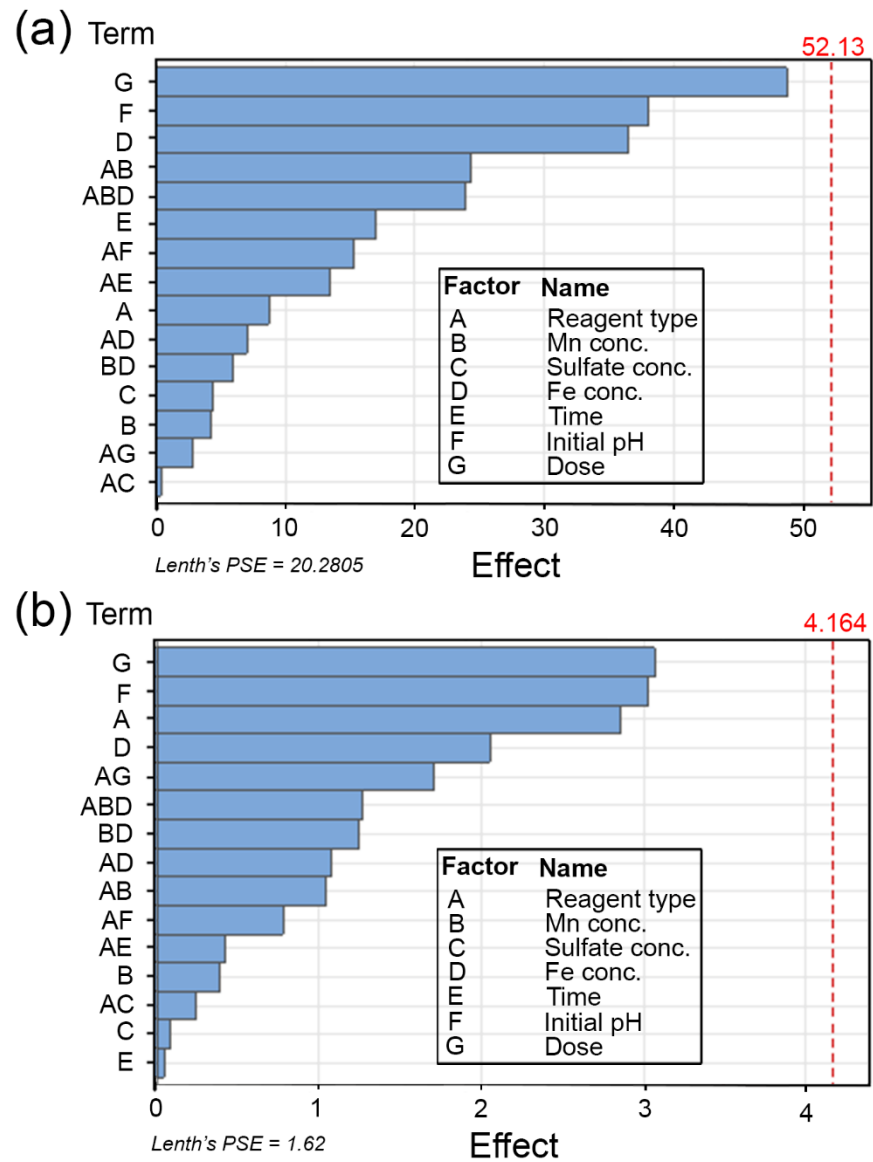

**Figure S6.** Pareto chart of the effects of variables on (a) Fe removal, and (b) final pH.
